# Supplementary material
Source: PubMed Central journal article supplement (PMC5981012)
Supplement: NIHMS945218-supplement-Supplementary_Material.pdf [file NIHMS945218-supplement-Supplementary_Material.pdf]

## Supplementary Materials

| Table S1       |                                         |                                         |
|----------------|-----------------------------------------|-----------------------------------------|
| Primer list    | Forward                                 | Reverse                                 |
| <i>β-Actin</i> | 5'- TCC TAG CAC CAT GAA GAT CAA G -3'   | 5'- GAA GGT GGA CAG TGA GGC -3'         |
| <i>GCLM</i>    | 5'- TGC TCT TCA CGA TGA CCG AGT ACC -3' | 5'- GCC ACC AGA TTT GAC TGC CTT TG -3'  |
| <i>GSTα2</i>   | 5'- ATG GAC AAG ACT ACC TTG TGG GCA -3' | 5'- GGC TGG CAT CAA GCT CTT CAA CAT -3' |
| <i>GSTα4</i>   | 5'- CCC ACA AGG TTC CAA TTG CAG TGT -3' | 5'- GGC ATT TGT CAT TGT GGG CAG AGT -3' |
| <i>NQO1</i>    | 5'- GAA GTC AGA TTA GGA GCC TCA G -3'   | 5'- GTC CCT CGG CCA TTG TTT A -3'       |
| <i>Prdx1</i>   | 5'- GTG AGA CCT GTG GCT CGA C -3'       | 5'- TGT CCA TCT GGC ATA ACA GC -3'      |
| <i>GSTm1</i>   | 5'- AGT CCA CAC AGC CTT CAT TC -3'      | 5'- CAG GCT GGC ACT CAA GTA TT-3'       |
| <i>GSTm2</i>   | 5'- CCT ATT CCT CCA TTT CCT CTT CC -3'  | 5'- CAA GGC AGC ACA CAG ACA -3'         |
| <i>Txnrd1</i>  | 5'- TCT GAA GAA AAA GCC GTA GAG AA -3'  | 5'- TTC CAA TGG CCA AAA GAA AC -3'      |
| <i>IL-1β</i>   | 5'- TTC AGG CAG GCA GTA TCA CTC -3'     | 5'- GAA GGT CCA CGG GAA AGA CAC -3'     |
| <i>IL-6</i>    | 5'- TAG TCC TTC CTA CCC CAA TTT CC -3'  | 5'- TTG GTC CTT AGC CAC TCC TTC -3'     |
| <i>TNF-α</i>   | 5'- CTG TAG CCC ACG TCG TAG C -3'       | 5'- TTG AGA TCC ATG CCG TTG -3'         |
| <i>ICAM-1</i>  | 5'- GGC ATT GTT CTC TAA TGT CTC CG -3'  | 5'- TGT CGA GCT TTG GGA TGG TAG -3'     |
| <i>CCL2</i>    | 5'- TTA AAA ACC TGG ATC GGA ACC AA -3'  | 5'- GCA TTA GCT TCA GAT TTA CGG GT -3'  |
| <i>CXCL10</i>  | 5'- CCA AGT GCT GCC GTC ATT TTC -3'     | 5'- TCC CTA TGG CCC TCA TTC TCA -3'     |
